# Supplementary material for: Export of radioactive cesium from agricultural fields under simulated rainfall in Fukushima
Source: Royal Society of Chemistry journal article supplement (doi:10.1039/c5em00063g), 2015-01-01
Supplement: c5em00063g1.pdf [file c5em00063g1.pdf]

1 **Figure S1. Photographs of the experimental setup**  
2

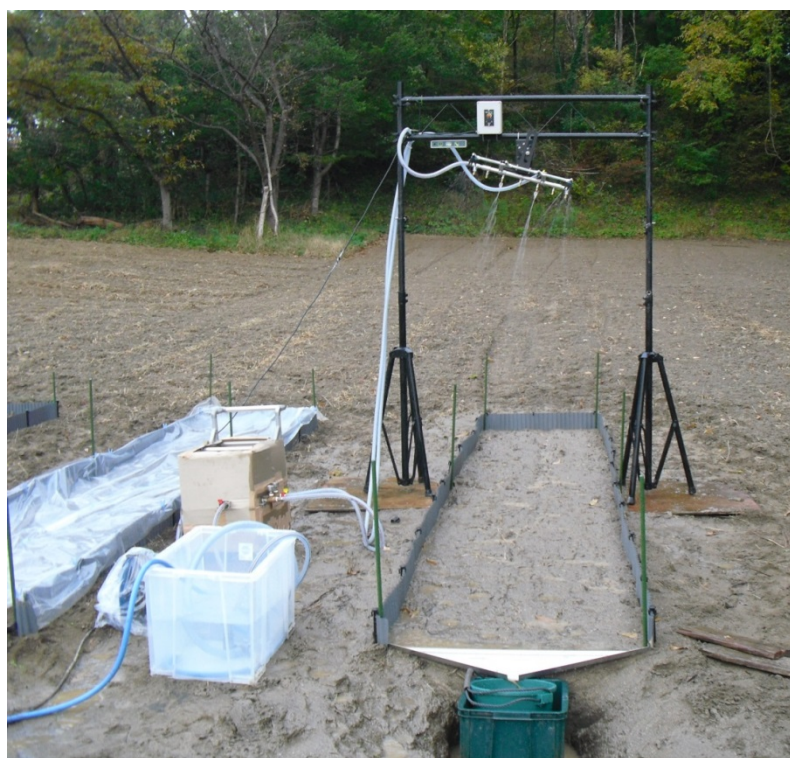

3  
4  
5  
6  
7

8 **Figure S2. Mean effective particle sizes ( $D_{30}$ ,  $D_{50}$  and  $D_{70}$ ) of soil (left) and sediment (right)**  
9 **samples in each plot. Error bars indicate  $\pm$  standard deviations.**  
10

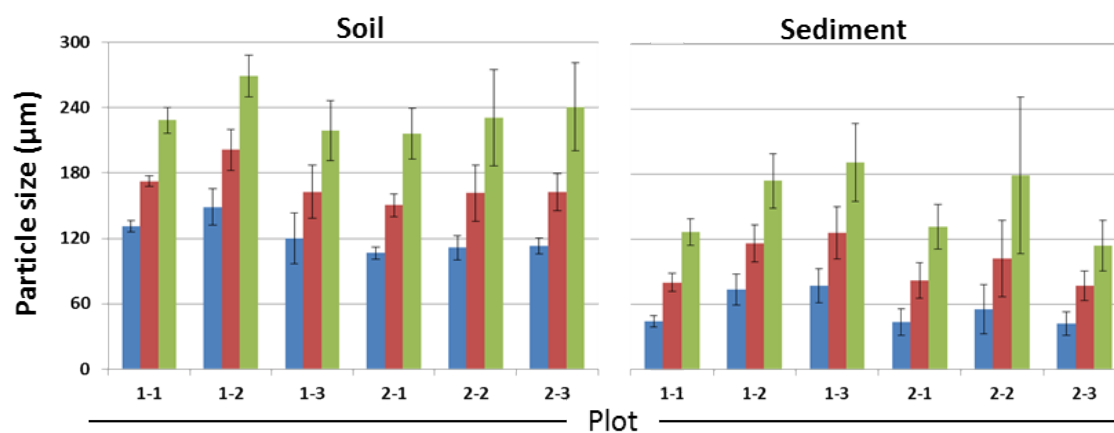

11

12

13
